# Supplementary material
Source: PubMed Central journal article supplement (PMC4495205)
Supplement: AEM.00868-15_zam999116438so1.pdf [file AEM.00868-15_zam999116438so1.pdf]

**TABLE S1** Putative targets of AveT.

| #  | Gene ID                                      | Putative target sites | Function                                                                                                               |
|----|----------------------------------------------|-----------------------|------------------------------------------------------------------------------------------------------------------------|
| 1  | <i>sav_5081, tagG</i><br><i>sav_5082</i>     | CGAAACGGTTGCGTTCCG    | putative ABC transporter permease protein<br>putative TetR-family transcriptional regulator                            |
| 2  | <i>sav_559</i>                               | CGAAACGGCGTCCTTTCG    | putative secreted protein                                                                                              |
| 3  | <i>sav_2282, pks3-3</i><br><i>sav_2283</i>   | CGATTCGGTTCGGTTCCG    | putative acyl carrier protein<br>putative aldehyde dehydrogenase                                                       |
| 4  | <i>sav_3240</i><br><i>sav_3241</i>           | GACAACGAAATGGGGTCG    | hypothetical protein<br>hypothetical protein                                                                           |
| 5  | <i>sav_5816</i>                              | TGAAAGCATTTACTTCAG    | putative secreted protein                                                                                              |
| 6  | <i>sav_6398, ectA</i>                        | CTAAACGCAAAGATTTTCG   | L-2,4-diaminobutyrate acetyltransferase                                                                                |
| 7  | <i>sav_6852, pabC2</i>                       | CGATACGGTAACGTTCCG    | putative aminodeoxychorismate lyase                                                                                    |
| 8  | <i>sav_7048</i>                              | GAAACGTAAACCGTTGCG    | putative cation efflux system protein                                                                                  |
| 9  | <i>sav_7490, aveM</i><br><i>sav_7491</i>     | CGAAACGTTGCCGTTTCG    | putative transmembrane efflux protein<br>hypothetical protein                                                          |
| 10 | <i>sav_626</i>                               | GGGAAATAACCTGTTCCG    | hypothetical protein                                                                                                   |
| 11 | <i>sav_2577, lplA</i><br><br><i>sav_2578</i> | CGCAACAACCTCCGTTTCC   | putative multiple sugar ABC transporter<br>substrate-binding protein<br>putative sugar hydrolase                       |
| 12 | <i>sav_2712</i>                              | CGGAACCTTGCTTTTCCC    | hypothetical protein                                                                                                   |
| 13 | <i>sav_3026, nrdL</i>                        | CACAAGTACACCGTTGCG    | putative ribonucleoside-diphosphate reductase<br>alpha chain                                                           |
| 14 | <i>sav_3343, pmmB</i>                        | CGAAACGACTCCGCCCCG    | putative phosphomannomutase                                                                                            |
| 15 | <i>sav_3560</i>                              | CGATACCGGATGGTTTCG    | putative two-component system sensor kinase                                                                            |
| 16 | <i>sav_4488</i>                              | CGAAACGGCTACCCTTCC    | putative simple sugar ABC transporter<br>substrate-binding protein                                                     |
| 17 | <i>sav_4630</i>                              | GGAAACCGGACCGTTTCC    | hypothetical protein                                                                                                   |
| 18 | <i>sav_5287</i>                              | CCGAACTCAAACGTCTCG    | putative integrin-like protein                                                                                         |
| 19 | <i>sav_5485</i>                              | CACCACCAAATCGTTTCC    | hypothetical protein                                                                                                   |
| 20 | <i>sav_7123, pfkA3</i>                       | CCGCATGAAACGGTTCCG    | 6-phosphofructokinase                                                                                                  |
| 21 | <i>sav_7270</i><br><i>sav_7271</i>           | TGGAAGTCAATGGATTCG    | putative LacI-family transcriptional regulator<br>putative multiple sugar ABC transporter<br>substrate-binding protein |
| 22 | <i>sav_14, trn4</i>                          | CGAAACCATCCGGTATCG    | codon recognized: CAA anticodon                                                                                        |
| 23 | <i>sav_420</i>                               | CGAAACGGCACCTTCTAG    | putative Tn3 family ISXc5-like transposase                                                                             |
| 24 | <i>sav_525</i>                               | TGAAAACAAAGCGCTTCG    | putative IS630 family ISXo7-like transposase                                                                           |
| 25 | <i>sav_575, cyp2</i>                         | CGAAACGTTCTGTTTCT     | putative cytochrome P450 /<br>NADPH-ferrihemoprotein reductase                                                         |
| 26 | <i>sav_618</i>                               | GGAAACGACGACGCTTCC    | hypothetical protein                                                                                                   |
| 27 | <i>sav_1907</i>                              | CGAAACGGCCGCGGCCCG    | putative acetyltransferase                                                                                             |
| 28 | <i>sav_1953</i>                              | CGAAACGTGATCGACTCC    | putative hydrolase                                                                                                     |
| 29 | <i>sav_2410</i>                              | GCGGAACCAATGGTTTTCG   | hypothetical protein                                                                                                   |
| 30 | <i>sav_2653</i>                              | CGATCCGCTTCCGTCTCG    | hypothetical protein                                                                                                   |
| 31 | <i>sav_2821</i>                              | TAGGAACATACGGTTTTCG   | hypothetical protein                                                                                                   |

|    |                                                  |                     |                                                                                                       |
|----|--------------------------------------------------|---------------------|-------------------------------------------------------------------------------------------------------|
| 32 | <i>sav_3217</i><br><i>sav_3218, fumB</i>         | GGAAACCCCTTCCTCGCC  | hypothetical protein<br>putative fumarate hydratase class I                                           |
| 33 | <i>sav_3667</i>                                  | CGTTGCGGAATCGTTTCG  | putative erythropoiesis-stimulating protein                                                           |
| 34 | <i>sav_3677</i>                                  | CGTTACGGGCACGTTTCG  | putative ABC transporter permease protein                                                             |
| 35 | <i>sav_4223, pepD3</i><br><i>sav_4224, glpQ2</i> | GGGAATATAACTGTTTAG  | putative serine protease, secreted<br>putative glycerophosphoryl diester<br>phosphodiesterase         |
| 36 | <i>sav_4634</i>                                  | CGAATCGGAGCCGCTCCG  | putative glycosyltransferase                                                                          |
| 37 | <i>sav_4695</i>                                  | CGAAACGCGCATGTTTCC  | putative Lsr2-like protein                                                                            |
| 38 | <i>sav_5359</i>                                  | CGAAAAGTTGACGTTTCT  | putative glycosyltransferase                                                                          |
| 39 | <i>sav_5361, melC1-2</i>                         | CGAAACGTGCCCTTTTCG  | putative tyrosinase co-factor protein                                                                 |
| 40 | <i>sav_5367</i>                                  | CGAACGGGTTTCCTTCGA  | putative ABC transporter ATP-binding protein                                                          |
| 41 | <i>sav_5420</i>                                  | GGAAACGGATCCGGCTCG  | putative ROK-family transcriptional regulator                                                         |
| 42 | <i>sav_5943, panB</i><br><br><i>sav_5944</i>     | CGATACGGAACCGTCTCG  | putative 3-methyl-2-oxobutanoate<br>hydroxymethyltransferase<br>putative transmembrane efflux protein |
| 43 | <i>sav_6177, trpB</i>                            | CGGAACGCTCCCCTTCCG  | putative tryptophan synthase beta subunit                                                             |
| 44 | <i>sav_6709</i><br><i>sav_6710</i>               | CGAACATATCGCGTTTCG  | putative amino acid permease<br>putative PadR-like family transcriptional<br>regulator                |
| 45 | <i>sav_6917</i>                                  | CGAACC GCGTCCGGTTCG | putative TetR-family transcriptional regulator                                                        |
| 46 | <i>sav_6976, pgsA3</i>                           | GAAAACAAAAAAGCTCCG  | putative<br>CDP-diacylglycerol--glycerol-3-phosphate<br>3-phosphatidyl-transferase                    |
| 47 | <i>sav_7362, pks1-3</i>                          | GGGAAACAATGCGTTTCC  | putative modular polyketide synthase                                                                  |
| 48 | <i>sav_7400, sig57</i>                           | CGTTACGATTCGATTCG   | putative RNA polymerase sigma factor                                                                  |
| 49 | <i>sav_t66, trn66</i>                            | CGAACCCAAAACGTGTTCG | codon recognized: CUC anticodon                                                                       |

Yellow highlighting of numbers indicates that similar binding sites of AveT protein were found in bidirectional promoter regions of the divergently transcribed genes. Red front of numbers indicates the putative targets selected and confirmed experimentally by EMSAs.

**FIG S1**

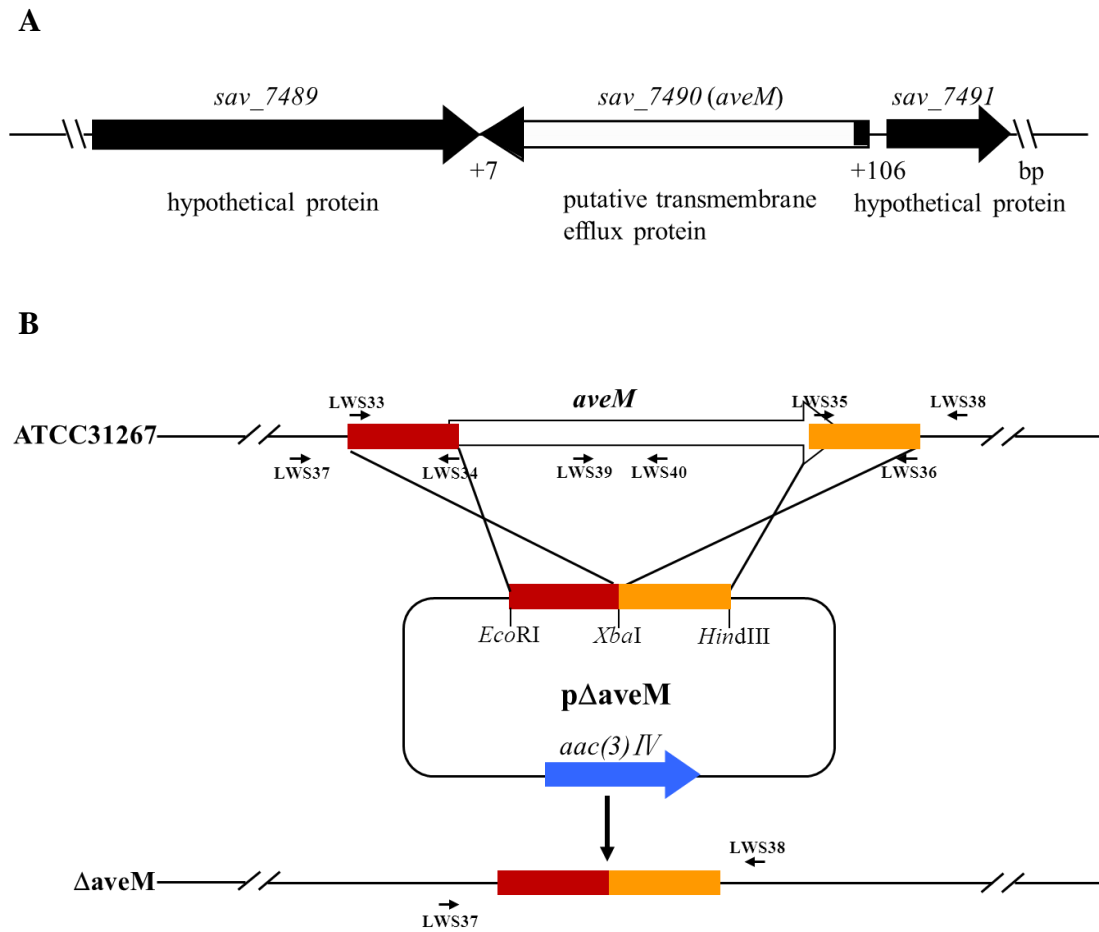

**FIG S1** Organization of *aveM* and its adjacent genes on the chromosome of *S. avermitilis* (A), and schematic method used for *aveM* deletion (B). (A) Gene notations are based on the *S. avermitilis* genome database (<http://avermitilis.ls.kitasato-u.ac.jp/>). White block: in-frame deletion in *aveM* gene. (B) Large arrows: genes and their directions. Short arrows: positions of primers used for cloning exchange regions and confirming gene deletion. Rectangles: homologous exchange regions used for deletion of *aveM*.

FIG S2

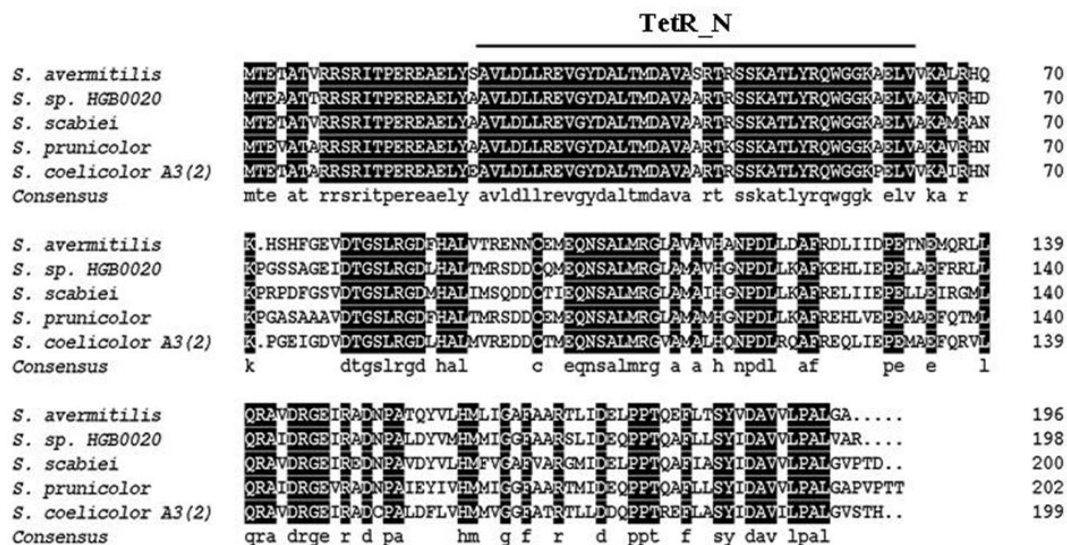

**FIG S2** Amino acid alignment of AveT and its homologous proteins in five *Streptomyces* species. AveT protein in *S. avermitilis* has high identity with its homologs in *S. sp. HGB0020* (78%), *S. scabiei* (78%), *S. prunicolor* (76%), and *S. coelicolor* (75%). Black line at top: TetR\_N domain.

**FIG S3**

**A**

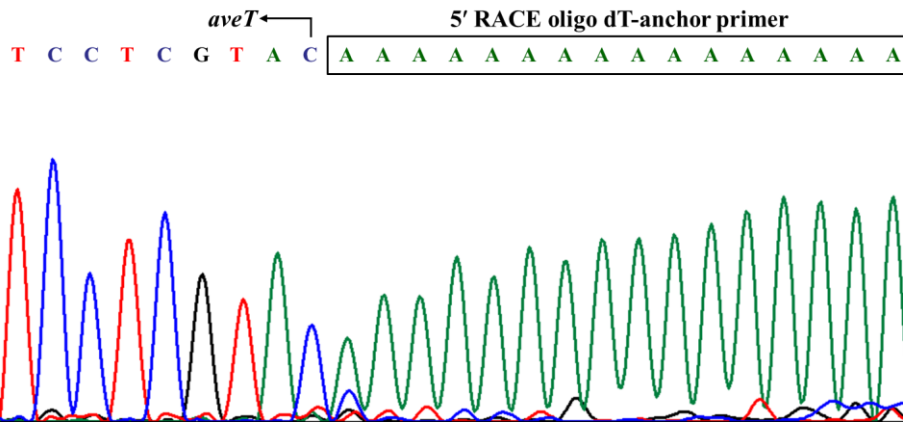

**B**

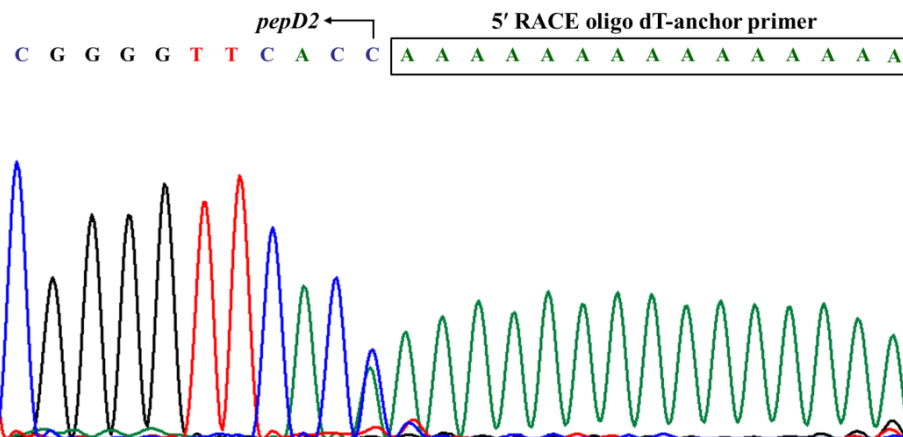

**FIG S3** Determination of TSSs of *aveT* (A) and *pepD2* (B) by 5'-RACE PCR. Boxed areas: complementary sequences of 5'-RACE oligo dT-anchor primers. Bent arrows: complementary bases of TSSs.

**FIG S4**

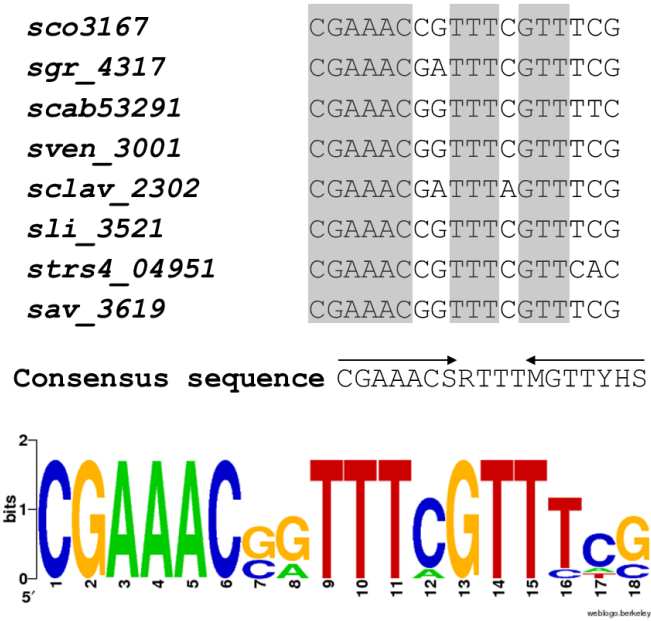

**FIG S4** Analysis of the consensus sequence of AveT-binding sites. The consensus bases in the AveT-binding sequence are boxed and conserved 7 bp inverted repeats are indicated by arrows. In the sequence logo of AveT binding consensus, the height of each letter is proportional to the frequency of the base appearance.



**FIG S6**

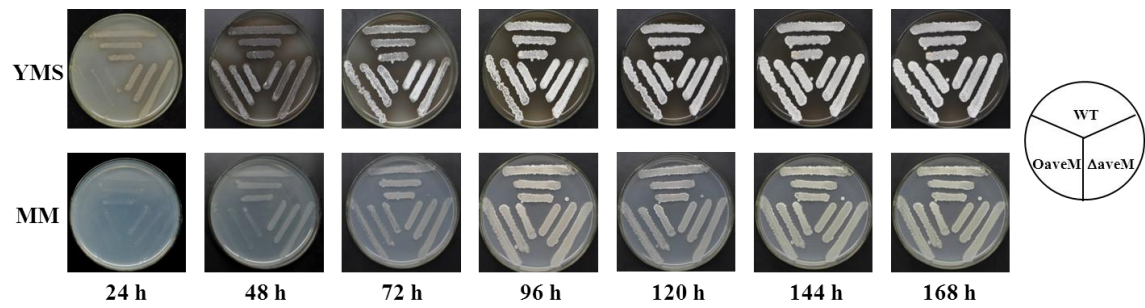

**FIG S6** Effects of deletion and overexpression of *aveM* on morphological differentiation of *S. avermitilis*. WT strain ATCC31267, *aveM* deletion mutant  $\Delta$ aveM, and *aveM* overexpression strain OaveM were grown on YMS or MM plates for 7 days at 28 °C.



**FIG S7**

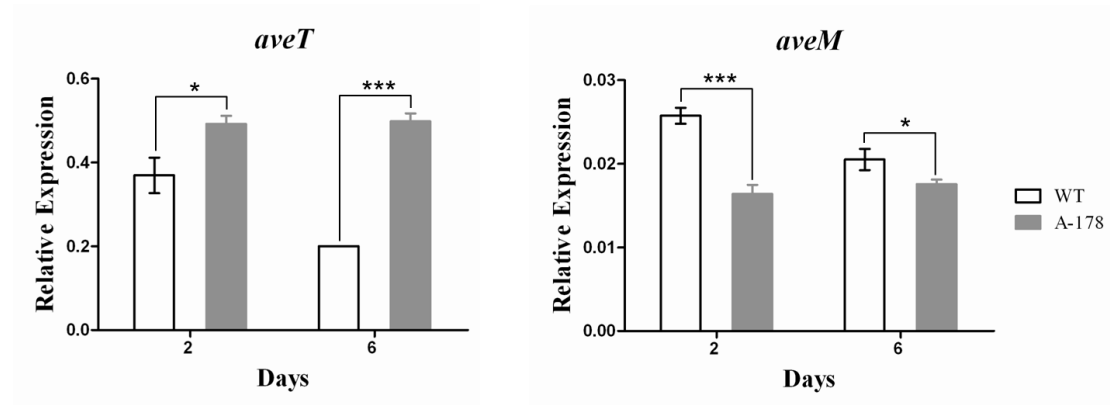

**FIG S7** Real-time RT-PCR analysis of *aveT* and *aveM* transcription levels in the WT and A-178 strains. RNA samples were isolated from 2- and 6-day fermentation cultures in FM-I. Relative transcription levels were obtained after normalization against internal reference *hrdB* at specific time points. Error bars, SD from three independent experiments. \*, P<0.05; \*\*\*, P<0.001 by Student's *t*-test.

**FIG S8**

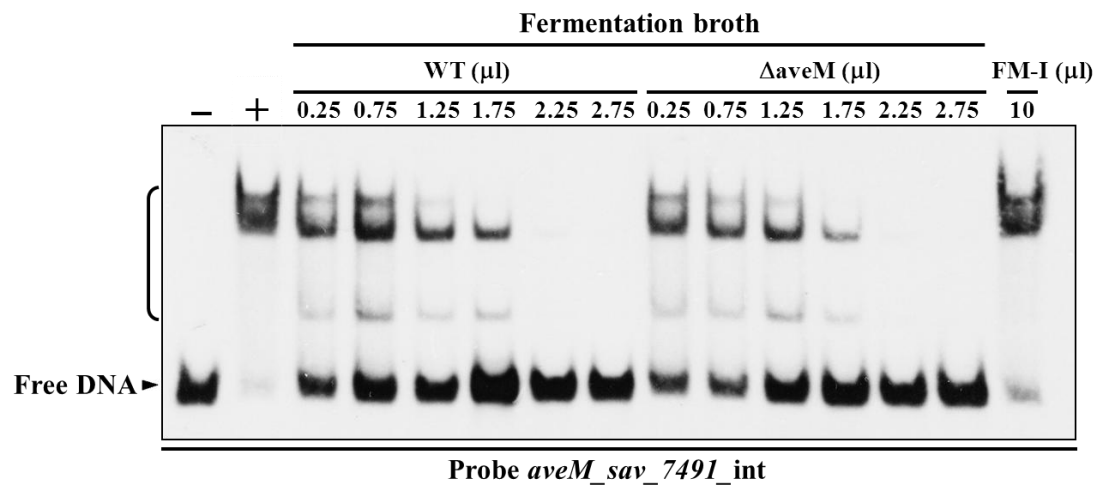

**FIG S8** EMSAs of AveT (0.05 μM) with concentrated fermentation broth of WT and *aveM* deletion mutant ΔaveM grown in FM-I for 10 days. Concentrated supernatant of fermentation medium FM-I was used as medium control. Each lane contained 0.15 nM labeled probe.

**FIG S9**

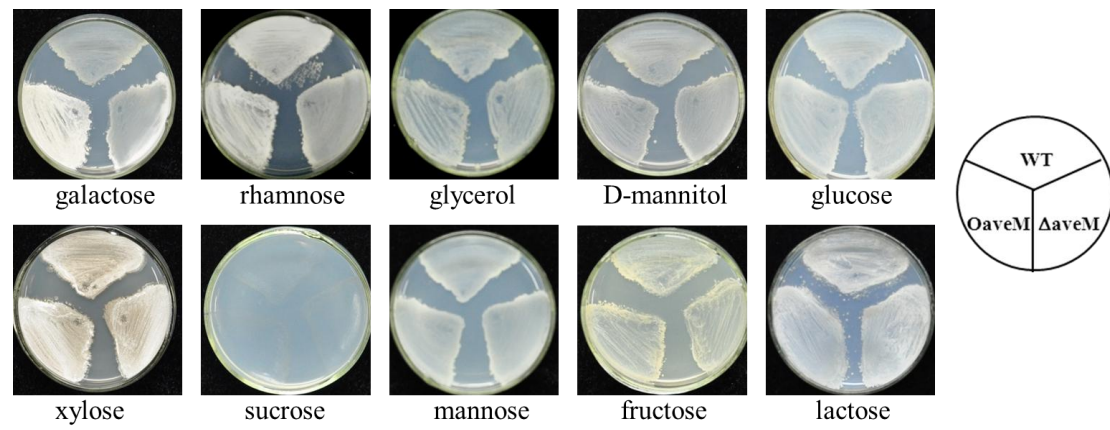

**FIG S9** Phenotypes (day 10) of WT,  $\Delta$ aveM, and OaveM grown on MM containing various carbon sources (1%).
